# Supplementary material
Source: PubMed Central journal article supplement (PMC10753496)
Supplement: joces-136-261152-s1.pdf [file joces-136-261152-s1.pdf]

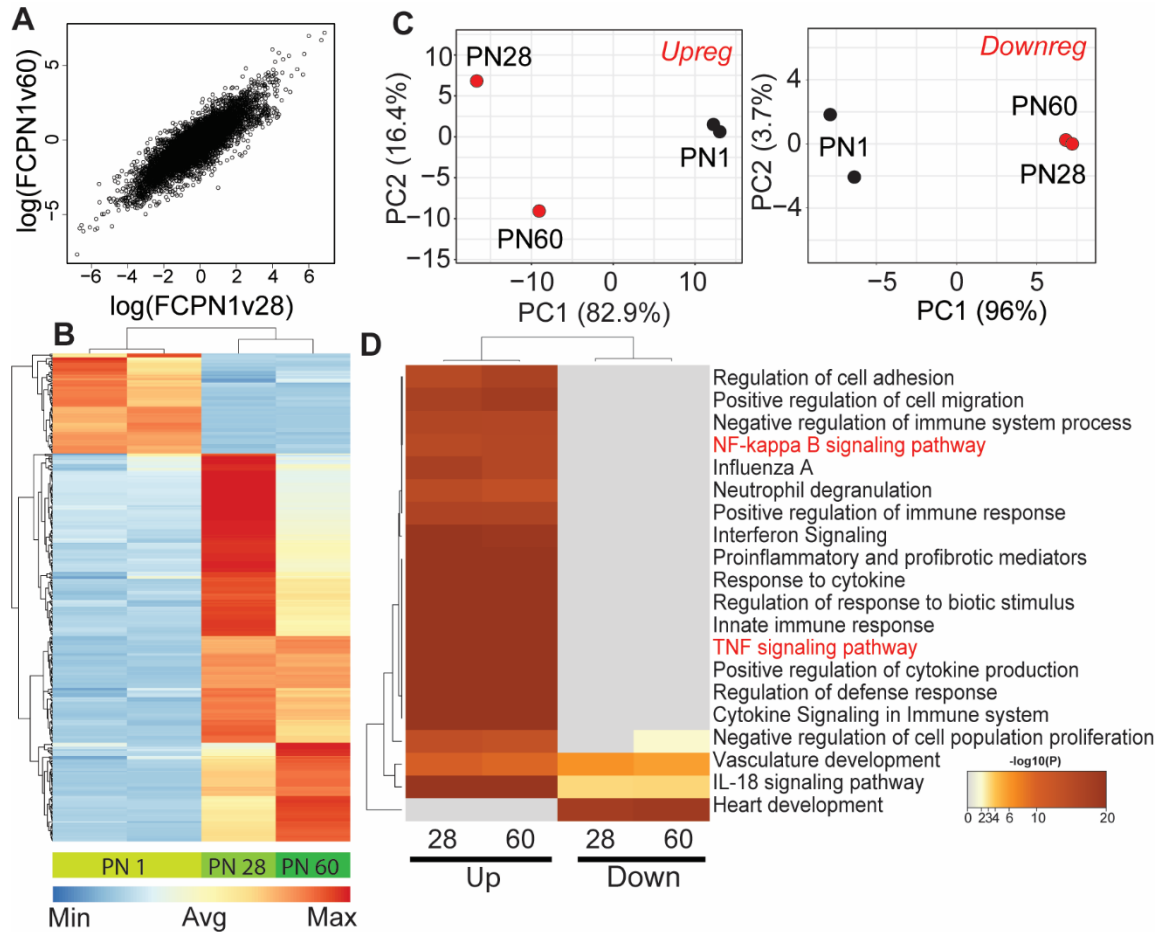

**Fig. S1. Inflammatory signatures dampen regenerative capacity in adult hearts. (A)** Scatter plot showing strong correlation between up/down-regulated genes after 28 and 60 days. **(B)** Heatmap of top 500 differentially expressed genes. **(C)** Principal component analysis (PCA) of differentially expressed genes. Age drives the majority of variance in the dataset. **(D)** Metascape gene ontologies of differentially expressed genes.

**A**

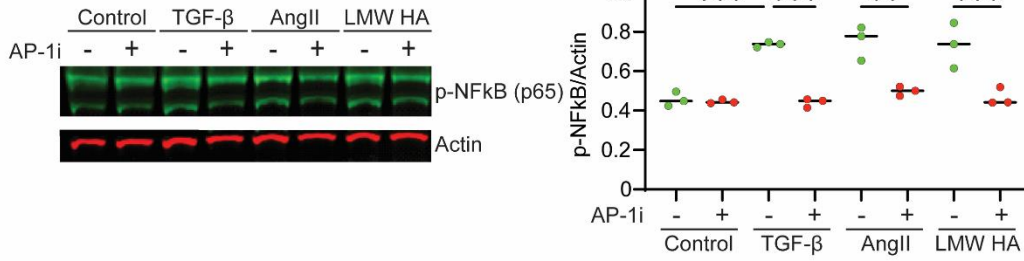

**B**

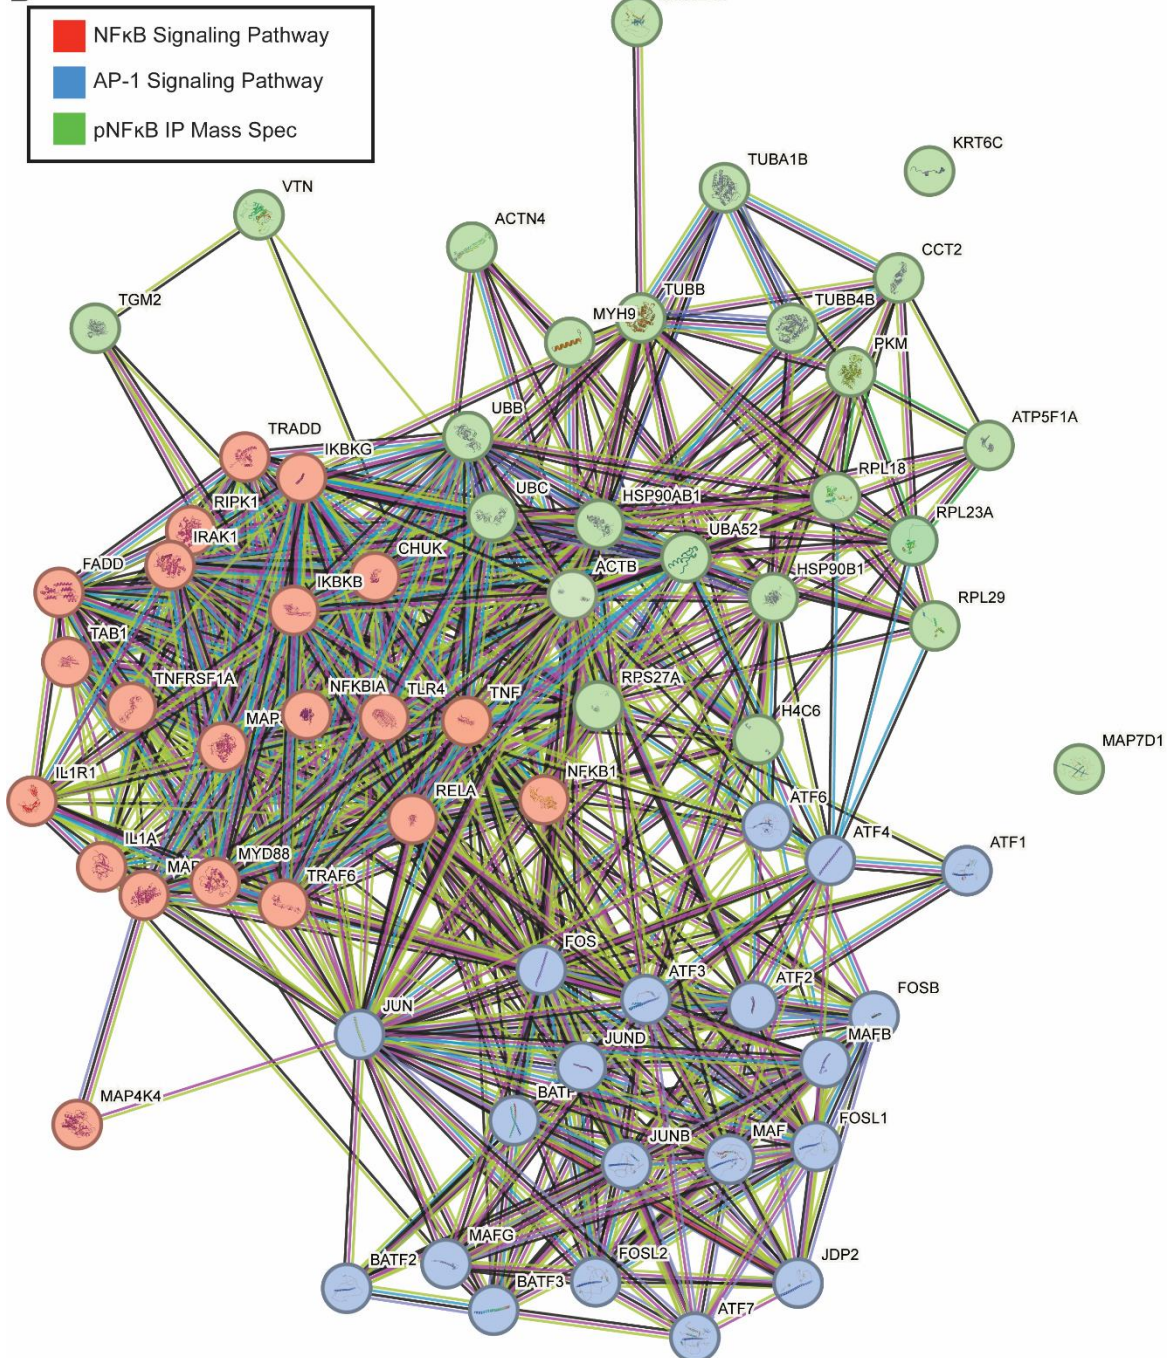

**Fig. S2. Interactions between AP-1 and NFκB pathways.** (A) Representative Western blot (left) and quantification (right) of phosphorylated NFκB following 60 minutes of agonist treatment and with/without AP-1 inhibitor (T-5224). Error bars denote Mean ± SD, \*  $p < 0.05$  as determined by one-way ANOVA with Dunnet test comparison to control. Statistical significance was determined by one-way ANOVA with Dunnet test comparison to control,  $p < 0.05$ ,  $n = 3$ . (B) Protein-protein association maps of known NFκB and AP-1 signaling pathways combined with proteins detected by mass spectrometry on p-NFκB IP samples. Plot generated by STRING.

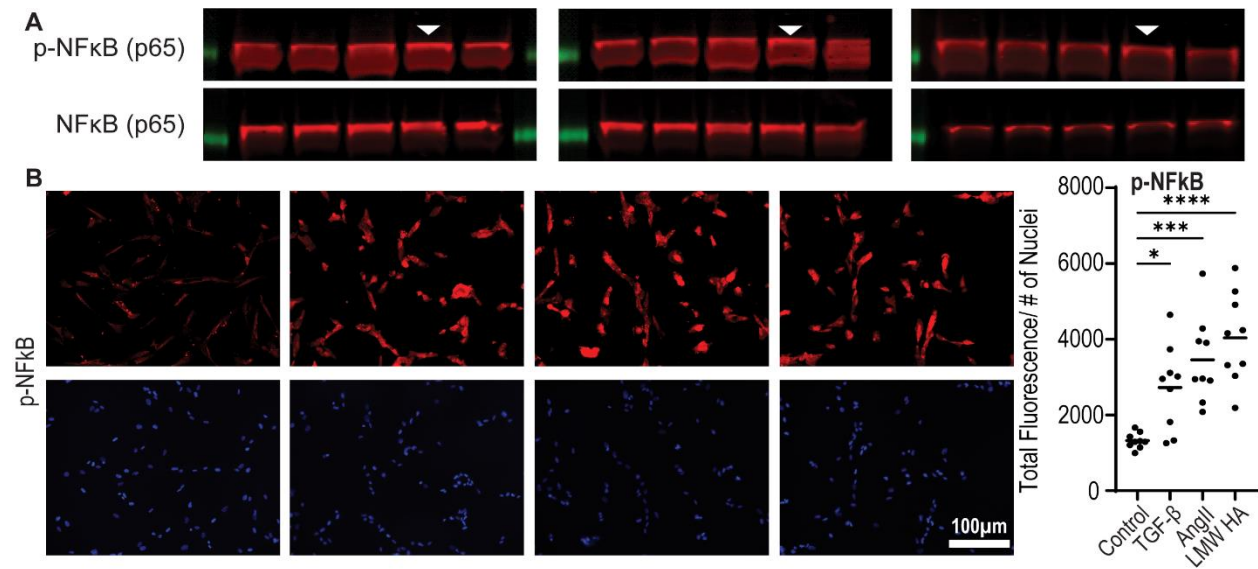

**Fig. S3. Agonist treatment activates NFκB signaling:** (A) Representative Western blots of phosphorylated and total NFκB following 0, 15, 30, 60, and 120 minutes of agonist treatment. (B) Representative immunofluorescence images (left) and quantification (right) of phospho-p65 (60 minutes post-agonist treatment). Error bars denote Mean ± SD, \*  $p < 0.05$  as determined by one-way ANOVA with Dunnet test comparison to control. Statistical significance was determined by one-way ANOVA with Dunnet test comparison to control,  $p < 0.05$ ,  $n = 3$ .



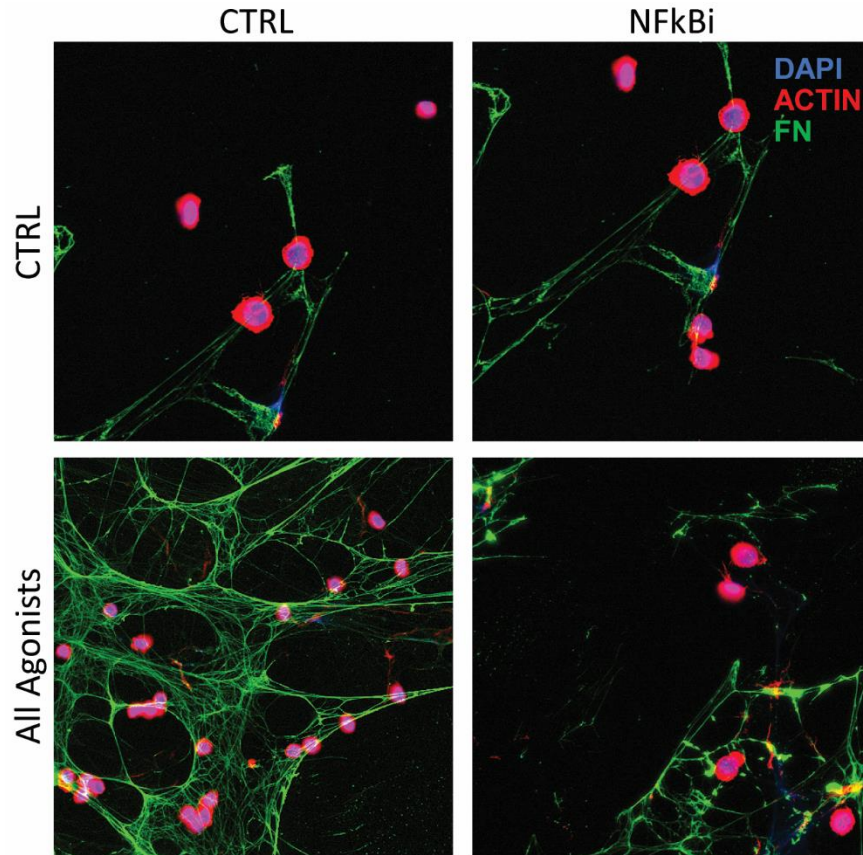

**Fig. S4. Monocytes adhere to assembled FN matrix.** U937 monocytes adhered primarily to decellularized fibronectin matrix created and assembled by control vs. NFκB iCFs treated with TGFβ, LMW HA, and ANGII for 72 hours.

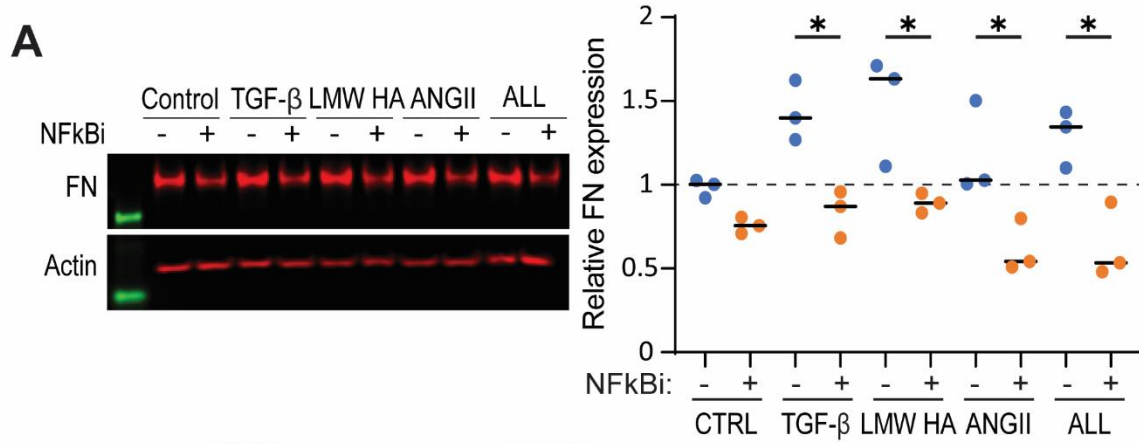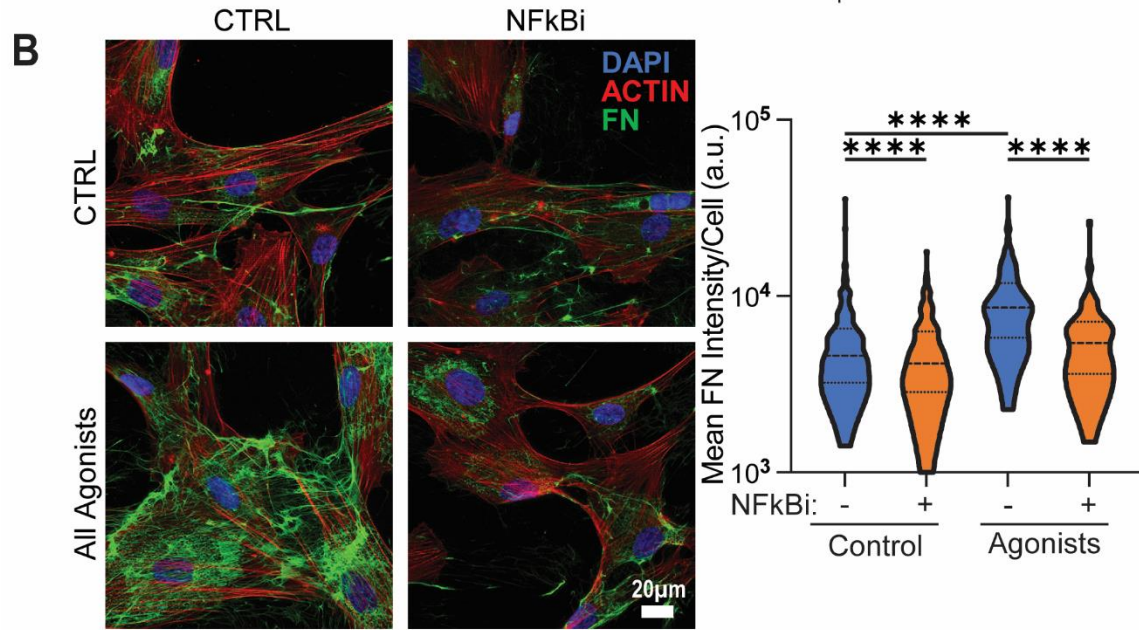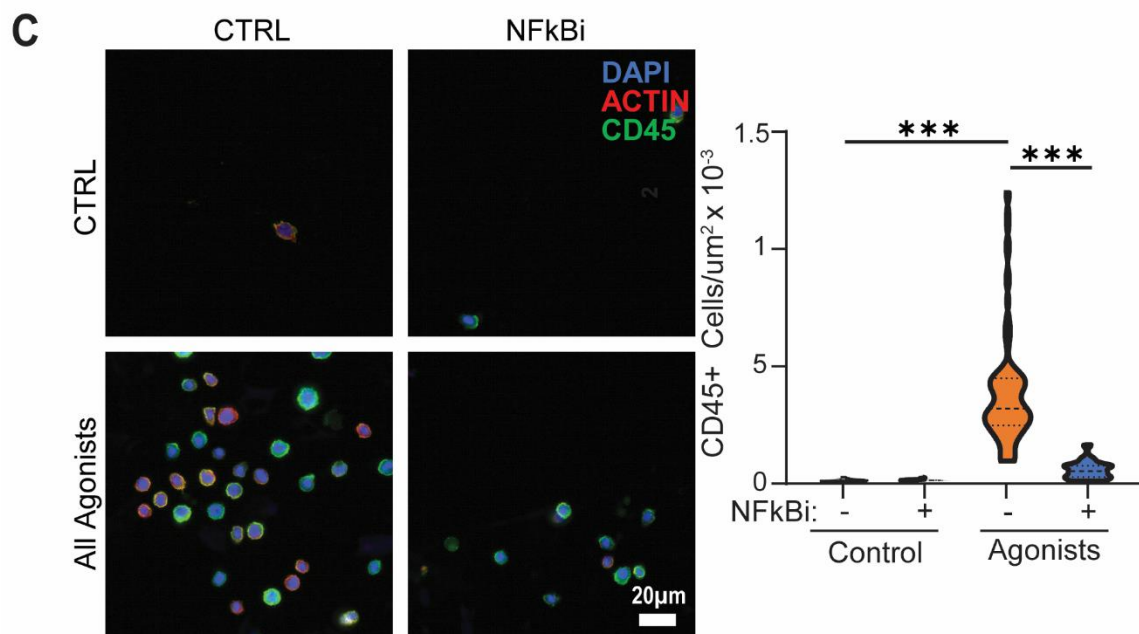

**Fig. S5. NFκB mediates agonist matrix responses.** (A) Representative Western blot (left) and quantification (right) of cellular fibronectin (FN) in control vs. NFκB inhibitor (BMS-345541) treated iCFs exposed to TGFβ, LMW HA, ANGII, or a combination of all agonists. Error bars denote Mean ± SD for three independent experiments, \*  $p < 0.05$  as determined by one-way ANOVA. (B) Representative immunofluorescent images of iCFs treated with TGFβ, LMW HA, and ANGII for 72 hours (left) and quantification of mean FN signal per cell (right), \*  $p < 0.05$  as determined by one-way ANOVA. (C) Representative immunofluorescent images of U937 monocytes adhered to decellularized matrices obtained from control vs. NFκB iCFs treated with TGFβ, LMW HA, and ANGII for 72 hours, \*  $p < 0.05$  as determined by a nonparametric Kruskal-Wallis test.

**Table S1. Proteins identified by mass spectrometry following p-NFκB IP.** Data shown indicate (left to right): the Protein.Group, Protein.ID, Accession, Area.Sample.1, Post-translational Modification (PTM), Average Mass, Description, MassNormPeak, and RelAbund.

Available for download at

<https://journals.biologists.com/jcs/article-lookup/doi/10.1242/jcs.261152#supplementary-data>

**Table S2. Summary of ATAQ-Seq on iCFs.** Summary includes separate tabs for analysis of all peaks, differentially accessible regions (DARs), RR regions with AP-1 motifs, RKO regions with AP-1 motifs, RR regions with GATA motifs, and RKO regions with GATA motifs. Data shown indicate (left to right): ID, seqnames, start, end, width, Conc, Conc\_RR, Conc\_RKO, Fold, p.value, FDR, Chr, Start, End, Annotation, Detailed.Annotation, Distance.to.TSS, Nearest.PromoterID, Entrez.ID, Nearest.Unigene, Nearest.Refseq, Nearest.Ensembl, Gene.Name, Gene.Alias, Gene.Description, and Gene.Type.

Available for download at

<https://journals.biologists.com/jcs/article-lookup/doi/10.1242/jcs.261152#supplementary-data>

**Table S3. Regions predicted to have both AP-1 and GATA binding sites.** This table annotates regions containing predicted motifs for both AP-1 and GATA. Data shown indicate (left to right): Chr, Start, End, Annotation, Distance to TSS, Nearest PromoterID, Nearest Refseq, Gene Name, and Gene Type.

Available for download at

<https://journals.biologists.com/jcs/article-lookup/doi/10.1242/jcs.261152#supplementary-data>

**Table S4. Transcriptional expression of AP-1 factors in Risk and Risk KO iPSC-cardiac fibroblasts.** TPM values for the indicated samples from RR and RRKO cell lines.

Available for download at

<https://journals.biologists.com/jcs/article-lookup/doi/10.1242/jcs.261152#supplementary-data>
